# Supplementary material for: LIMA (v1.0): A quasi two-moment microphysical scheme driven by a multimodal population of cloud condensation and ice freezing nuclei
Source: Copernicus journal article supplement (doi:10.5194/gmd-9-567-2016), 2016-02-10
Supplement: Supplementary file [file gmd-9-567-2016-supplement-title-page.pdf › gmd-9-567-2016-supplement-title-page.pdf]

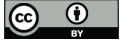

## *Supplement of*

# **LIMA (v1.0): A quasi two-moment microphysical scheme driven by a multimodal population of cloud condensation and ice freezing nuclei**

**B. Vié et al.**

*Correspondence to:* B. Vié ([benoit.vie@meteo.fr](mailto:benoit.vie@meteo.fr))

- [gmd-9-567-2016-supplement-title-page.pdf](#)
- [LIMA13\\_410\\_GMD](#)

The copyright of individual parts of the supplement might differ from the CC-BY 3.0 licence.
